# Supplementary material for: IL-36γ is a crucial proximal component of protective type-1-mediated lung mucosal immunity in Gram-positive and -negative bacterial pneumonia
Source: PubMed Central journal article supplement — Mucosal Immunol. 2017 Feb 8;10(5):1320–34. doi: 10.1038/mi.2016.130 (PMC5548659; doi:10.1038/mi.2016.130), 2017-02-08
Supplement: NIHMS834741-supplement-01.pdf [file NIHMS834741-supplement-01.pdf]

**Supplemental Data:**

**Supplemental Fig. 1 – Effect of IL-36 $\gamma$  on induction of antimicrobial peptides in lung cells:**

Lung macrophages (Mac), type II alveolar epithelial cells (AEC), and bone marrow-derived dendritic cells (BMDC) were isolated from WT mice and were stimulated with either recombinant IL-36 $\gamma$  (50ng/mL) or vehicle for 6 hours. *Cnlp* and  $\beta$ -defensin-3 mRNA was assessed by RT-PCR. No significant induction was observed in stimulated cells relative to unstimulated cells (student's *t* test, n = 3-4 replicates per group, representative of 2 experiments).

**Supplementary Table S1 – Demographic and clinical data of ARDS study population:**

|                         | <b>Control</b> | <b>ARDS Patients</b> |
|-------------------------|----------------|----------------------|
| Age                     | 45.8 ± 8.31    | 46.72 ± 15.62        |
| Male:Female             | 3:2            | 28:12                |
| APACHE Score            |                | 66.44 ± 13.12        |
| P/f ratio               |                | 107.33 ± 50.78       |
| Ventilator-Free Days    |                | 14.67 ± 8.0          |
| Organ Failure-Free Days |                | 18.16 ± 10.97        |

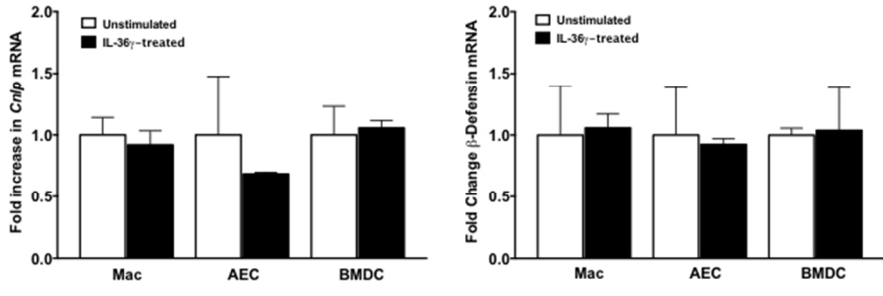

254x190mm (72 x 72 DPI)
